# Supplementary material
Source: PubMed Central journal article supplement (PMC5614446)
Supplement: NIHMS905818-supplement-Supplemental_Tables_S1-4.pdf [file NIHMS905818-supplement-Supplemental_Tables_S1-4.pdf]

Table S1. Open reading frames (ORF) and DHS elements on 10 fragments of linear plasmids of *Borrelia hermsii* with *vsp* and *vlp* genes and shown in physical maps of Figure 2

| Fragment (size)             | ORF                          | Start position | End position | Positions 22-23 of UHS of $\geq 33$ nt | Fragment (size)               | ORF                     | Start position   | End position | Positions 22-23 of UHS of $\geq 33$ nt |    |
|-----------------------------|------------------------------|----------------|--------------|----------------------------------------|-------------------------------|-------------------------|------------------|--------------|----------------------------------------|----|
| I<br>(14,338 bp)<br>lp28-1  | PF50                         | 1              | 156          |                                        | VI<br>(23,848 bp)             | PF96                    | 745              | 5            |                                        |    |
|                             | PF32                         | 176            | 300          |                                        |                               | <i>mip</i>              | 1675             | 1262         |                                        |    |
|                             | <i>tra</i> fragment          | 420            | 646          |                                        |                               | PF115                   | 1847             | 2404         |                                        |    |
|                             | PF49                         | 1376           | 807          |                                        |                               | PF145                   | 2424             | 3465         |                                        |    |
|                             | PF32                         | 2133           | 1390         |                                        |                               | <i>bdr</i> fragment     | 4029             | 3874         |                                        |    |
|                             | PF50                         | 2312           | 2139         |                                        |                               | PF88                    | 4403             | 4113         |                                        |    |
|                             | <i>tra</i> fragment          | 2618           | 2844         |                                        |                               | <i>vsp24</i>            | 4641             | 5285         | T-                                     |    |
|                             | <i>vlp39</i>                 | 3980           | 3063         |                                        |                               | DHS <sub>s</sub>        | 5328             | 5541         |                                        |    |
|                             | <i>dvlp36</i>                | 4177           | 5253         | T-                                     |                               | <i>vsp1</i>             | 5663             | 6307         | T-                                     |    |
|                             | <i>vsp13</i>                 | 5373           | 6022         | T-                                     |                               | DHS <sub>s</sub>        | 6350             | 6563         |                                        |    |
|                             | <i>vlp19</i>                 | 7109           | 6153         |                                        |                               | <i>vsp27</i>            | 6685             | 7335         | T-                                     |    |
|                             | <i>vsp28</i>                 | 7684           | 8334         | G-                                     |                               | <i>bdr</i>              | 7850             | 8251         |                                        |    |
|                             | <i>vlp</i> fragment          | 9098           | 8355         |                                        |                               | PF146                   | 8359             | 8639         |                                        |    |
|                             | <i>dvlp</i> pseudogene       | 9091           | 9960         |                                        |                               | <i>mip</i>              | 9250             | 8822         |                                        |    |
|                             | <i>vsp28</i> pseudogene      | 10080          | 10729        |                                        |                               | PF113                   | 9894             | 9289         |                                        |    |
|                             | <i>vlp5</i>                  | 11778          | 10852        |                                        |                               | <i>vsp2</i>             | 10081            | 10728        | T-                                     |    |
|                             | <i>avlp7</i>                 | 12094          | 13203        | T-                                     |                               | DHS <sub>s</sub>        | 10772            | 10985        |                                        |    |
|                             | <i>vsp26</i>                 | 13340          | 13981        |                                        |                               | <i>vsp72</i>            | 11133            | 11729        |                                        |    |
|                             | DHS <sub>s</sub>             | 14025          | 14237        |                                        |                               | <i>vlp37</i>            | 11844            | 12890        |                                        |    |
| II<br>(8,913 bp)<br>lp32-1  | PF145                        | 1              | 192          |                                        | <i>vsp59</i>                  | 13658                   | 13014            |              |                                        |    |
|                             | <i>femD</i> fragment         | 548            | 333          |                                        | <i>avlp44</i>                 | 14887                   | 13779            | TA           |                                        |    |
|                             | <i>vsp6</i>                  | 680            | 1327         | T-                                     | PF12                          | 15820                   | 15569            |              |                                        |    |
|                             | DHS <sub>s</sub>             | 1371           | 1583         |                                        | <i>vlp</i> pseudogene         | 16857                   | 18068            |              |                                        |    |
|                             | <i>vsp69</i> pseudogene      | 1627           | 2209         |                                        | <i>dvlp46</i>                 | 18061                   | 18958            | T-           |                                        |    |
|                             | <i>avlp7</i>                 | 2441           | 3550         | T-                                     | <i>dvlp9</i>                  | 19260                   | 18184            | T-           |                                        |    |
|                             | <i>vsp26</i>                 | 3687           | 4328         |                                        | <i>vlp49</i>                  | 20392                   | 19366            | T-           |                                        |    |
|                             | DHS <sub>s</sub>             | 4372           | 4584         |                                        | <i>dvlp</i> fragment          | 20930                   | 21412            |              |                                        |    |
|                             | <i>vlp</i> pseudogene        | 4621           | 5505         |                                        | BBG30                         | 21837                   | 21968            |              |                                        |    |
|                             | PF62                         | 6011           | 6595         |                                        | <i>bdr</i>                    | 22953                   | 22153            |              |                                        |    |
|                             | BBG30                        | 6600           | 7073         |                                        | PF88                          | 23787                   | 22987            |              |                                        |    |
|                             | <i>bdr</i> (PF80)            | 7810           | 7151         |                                        | VII<br>(22,769 bp)            | PF113                   | 566              | 97           |                                        |    |
|                             | PF88                         | 8644           | 7844         |                                        |                               | <i>vsp68</i>            | 829              | 1458         |                                        |    |
|                             | III<br>(16,331 bp)<br>lp28-2 | PF50           | 11           | 502                                    |                               |                         | PF145            | 1842         | 2177                                   |    |
|                             |                              | PF32           | 481          | 1218                                   |                               |                         | <i>bdr</i>       | 2220         | 2738                                   |    |
|                             |                              | PF49           | 1307         | 1841                                   |                               |                         | <i>avlp18</i>    | 2974         | 4056                                   | T- |
|                             |                              | PF161          | 2260         | 2472                                   |                               |                         | DHS <sub>s</sub> | 4174         | 4386                                   |    |
|                             |                              | PF112          | 2704         | 2543                                   |                               |                         | <i>vsp69</i>     | 4424         | 5068                                   |    |
|                             |                              | PF113          | 3439         | 3124                                   |                               |                         | <i>dvlp10</i>    | 5344         | 6366                                   |    |
| <i>vsp30</i>                |                              | 3761           | 4416         |                                        |                               | <i>dvlp56</i>           | 6480             | 7481         |                                        |    |
| <i>dvlp17</i> pseudogene    |                              | 4727           | 5632         |                                        |                               | <i>avlp70</i>           | 7746             | 8756         |                                        |    |
| <i>avlp25</i>               |                              | 5932           | 6884         |                                        |                               | <i>dvlp71</i>           | 8801             | 9868         |                                        |    |
| <i>dvlp</i> pseudogene      |                              | 7037           | 7990         |                                        |                               | <i>vlp43</i>            | 9987             | 10877        | G-                                     |    |
| <i>avlp21</i>               |                              | 8212           | 9306         | T-                                     |                               | <i>dvlp4</i>            | 11151            | 12110        |                                        |    |
| <i>dvlp34</i>               |                              | 9348           | 10418        |                                        |                               | <i>vsp3</i>             | 12248            | 12885        | T-                                     |    |
| DHS <sub>s</sub>            |                              | 10484          | 10696        |                                        |                               | <i>vlp43</i> pseudogene | 13139            | 13959        |                                        |    |
| <i>dvlp16</i>               |                              | 10819          | 11885        |                                        |                               | PF62                    | 14611            | 15189        |                                        |    |
| <i>vlp73</i>                |                              | 12095          | 12981        |                                        |                               | BBG30                   | 15191            | 15886        |                                        |    |
| <i>dvlp</i> fragment        |                              | 13115          | 13704        |                                        |                               | <i>bdr</i>              | 16465            | 15752        |                                        |    |
| PF62                        |                              | 13869          | 14384        |                                        |                               | PF88                    | 17254            | 16499        |                                        |    |
| BBG30                       |                              | 14450          | 14719        |                                        | PF84                          | 17556                   | 17253            |              |                                        |    |
| <i>bdr</i>                  |                              | 15670          | 14933        |                                        | <i>tsf</i> elongation factor  | 18240                   | 17647            |              |                                        |    |
| PF88                        | 16330                        | 15704          |              | BBG67                                  | 19254                         | 19105                   |                  |              |                                        |    |
| IV<br>(22,593 bp)<br>lp28-3 | BB086                        | 40             | 279          |                                        | hypothetical protein          | 20425                   | 19589            |              |                                        |    |
|                             | BB163                        | 275            | 505          |                                        | hypothetical protein          | 20843                   | 20421            |              |                                        |    |
|                             | PF32                         | 1037           | 468          |                                        | <i>bdr</i>                    | 21365                   | 20958            |              |                                        |    |
|                             | PF50                         | 1573           | 1016         |                                        | PF101                         | 11768                   | 21584            |              |                                        |    |
|                             | PF62                         | 2259           | 1630         |                                        | VIII<br>(21,706 bp)<br>lp28-4 | PF32                    | 305              | 54           |                                        |    |
|                             | <i>bdr</i>                   | 3626           | 3970         |                                        |                               | <i>dvlp14</i>           | 641              | 1723         | T-                                     |    |
|                             | <i>vsp11</i>                 | 4149           | 4761         |                                        |                               | DHS <sub>s</sub>        | 1803             | 2015         |                                        |    |
|                             | <i>vsp8</i>                  | 5094           | 5639         |                                        |                               | <i>vlp65</i>            | 2132             | 3217         |                                        |    |
|                             | <i>vlp48</i>                 | 5824           | 6862         | T-                                     |                               | <i>vsp66</i>            | 3958             | 3354         |                                        |    |
|                             | <i>vsp58</i>                 | 6979           | 7599         |                                        |                               | <i>vlp65</i> pseudogene | 5138             | 4062         |                                        |    |
|                             | DHS <sub>s</sub>             | 7643           | 7856         |                                        |                               | DHS <sub>s</sub>        | 5467             | 5255         |                                        |    |
|                             | <i>vsp22</i>                 | 7977           | 8633         | T-                                     |                               | <i>vlp54</i> pseudogene | 6573             | 5548         |                                        |    |
|                             | DHS <sub>s</sub>             | 8677           | 8889         |                                        |                               | PF161                   | 7066             | 7317         |                                        |    |
|                             | <i>dvlp32</i>                | 9010           | 10095        | T-                                     |                               | <i>dvlp</i> pseudogene  | 7527             | 8456         |                                        |    |
|                             | <i>dvlp23</i>                | 11240          | 10185        | T-                                     |                               | <i>vlp</i> pseudogene   | 8534             | 9366         |                                        |    |
|                             | PF32                         | 11576          | 12016        |                                        |                               | <i>dvlp</i> fragment    | 9758             | 10546        |                                        |    |
|                             | PF49                         | 12103          | 12504        |                                        |                               | <i>vlp77</i>            | 11133            | 12067        |                                        |    |
|                             | PF96                         | 13374          | 13015        |                                        |                               | <i>dvlp12</i>           | 12238            | 13294        | GA                                     |    |
|                             | <i>mip</i> (PF113)           | 14479          | 14057        |                                        |                               | <i>vlp54</i>            | 13421            | 14452        | GA                                     |    |
| PF113                       | 15133                        | 14513          |              | <i>dvlp76</i>                          |                               | 15600                   | 14563            | GA           |                                        |    |
| PF115                       | 15318                        | 15582          |              | <i>vlp53</i>                           |                               | 16732                   | 15728            |              |                                        |    |
| PF145                       | 15875                        | 16232          |              | PF57                                   |                               | 16738                   | 17463            |              |                                        |    |
| <i>femD</i> fragment        | 16677                        | 16373          |              | PF32                                   |                               | 17692                   | 18399            |              |                                        |    |
| <i>dvlp42</i>               | 16720                        | 17808          | T-           | PF49                                   | 18733                         | 19062                   |                  |              |                                        |    |
| DHS <sub>s</sub>            | 17650                        | 18062          |              | <i>vsp</i> pseudogene                  | 19638                         | 20213                   |                  |              |                                        |    |
| <i>vlp</i> fragment         | 18100                        | 18468          |              | <i>vsp75</i>                           | 20616                         | 21260                   |                  |              |                                        |    |
| PF12                        | 19451                        | 20362          |              | IX<br>(2,625 bp)                       | <i>vlp</i> fragment           | 363                     | 581              |              |                                        |    |
| BBK32                       | 21848                        | 20763          |              |                                        | <i>dvlp17</i>                 | 721                     | 1782             | T-           |                                        |    |
| <i>bdr</i> fragment         | 21923                        | 22093          |              |                                        | DHS <sub>s</sub>              | 1863                    | 2075             |              |                                        |    |
| V<br>(16,853 bp)            | <i>dvlp61</i>                | 186            | 1212         |                                        | <i>vlp</i> fragment           | 2113                    | 2481             |              |                                        |    |
|                             | <i>avlp62</i>                | 1381           | 2463         | T-                                     | X<br>(2,583 bp)               | <i>dvlp</i> fragment    | 1                | 551          |                                        |    |
|                             | <i>dvlp</i> pseudogene       | 2601           | 3580         |                                        |                               | <i>dvlp79</i>           | 670              | 1770         |                                        |    |
|                             | <i>vsp63</i>                 | 3873           | 4513         |                                        |                               | PF12                    | 2132             | 2583         |                                        |    |
|                             | <i>vlp64</i>                 | 4774           | 5754         |                                        |                               |                         |                  |              |                                        |    |
|                             | <i>dvlp</i> fragment         | 5897           | 6340         |                                        |                               |                         |                  |              |                                        |    |
|                             | PF62                         | 7233           | 6518         |                                        |                               |                         |                  |              |                                        |    |
|                             | PF104                        | 7921           | 8319         |                                        |                               |                         |                  |              |                                        |    |
|                             | PF86                         | 8465           | 8658         |                                        |                               |                         |                  |              |                                        |    |
|                             | BBG17                        | 9097           | 9861         |                                        |                               |                         |                  |              |                                        |    |
|                             | PF101                        | 9861           | 11697        |                                        |                               |                         |                  |              |                                        |    |
|                             | <i>bdr</i>                   | 11906          | 12322        |                                        |                               |                         |                  |              |                                        |    |
|                             | hypothetical protein         | 12437          | 12859        |                                        |                               |                         |                  |              |                                        |    |
|                             | hypothetical protein         | 12859          | 13691        |                                        |                               |                         |                  |              |                                        |    |
|                             | methvlase fragment           | 14026          | 14319        |                                        |                               |                         |                  |              |                                        |    |
|                             | methvlase                    | 14593          | 16851        |                                        |                               |                         |                  |              |                                        |    |

Table S2. Polymorphic sites (positions 22-23) of UHS regions of relapse expression sites and archival sites.

| Relapse isolate <sup>a</sup> | Expression site UHS | UHS for archival gene | Archival UHS length in nts <sup>b</sup> |
|------------------------------|---------------------|-----------------------|-----------------------------------------|
| 1-7-20                       | T-                  | T-                    | 45                                      |
| 1-7-12                       | T-                  | T-                    | 45                                      |
| 1-7-40                       | T-                  | T-                    | 45                                      |
| 1-7-24                       | T-                  | T-                    | 45                                      |
| 2-7-2                        | T-                  | T-                    | 53                                      |
| 2-7-4                        | T-                  | T-                    | 53                                      |
| 2-7-9                        | T-                  | T-                    | 53                                      |
| 2-7-21                       | T-                  | T-                    | 53                                      |
| 2-7-145                      | T-                  | T-                    | 53                                      |
| 6-7-16                       | T-                  | T-                    | 48                                      |
| 6-7-150                      | T-                  | T-                    | 48                                      |
| 6-7-11                       | T-                  | T-                    | 48                                      |
| 6-7-147                      | T-                  | T-                    | 48                                      |
| 6-7-144                      | T-                  | T-                    | 48                                      |
| 6-7-148                      | T-                  | T-                    | 48                                      |
| 17-7-37                      | GA                  | T-                    | 45                                      |
| 17-7-148                     | T-                  | T-                    | 45                                      |
| 17-7-150                     | T-                  | T-                    | 45                                      |
| 17-7-144                     | T-                  | T-                    | 45                                      |
| 7/18-7-22                    | T-                  | T-                    | 61                                      |
| 18-7-10                      | T-                  | T-                    | 46                                      |
| 18-7-18                      | T-                  | T-                    | 46                                      |
| 18-7-20                      | T-                  | T-                    | 46                                      |
| 18-7-4                       | T-                  | T-                    | 46                                      |
| 18-7-21                      | T-                  | T-                    | 46                                      |
| 18-7-2                       | T-                  | T-                    | 46                                      |
| 18-7-23                      | T-                  | T-                    | 46                                      |
| 18-7-138                     | T-                  | T-                    | 46                                      |
| 18-7-146                     | T-                  | T-                    | 46                                      |
| 24-7-13                      | T-                  | T-                    | 59                                      |
| 24-7-18                      | T-                  | T-                    | 59                                      |
| 24-7-22                      | T-                  | T-                    | 59                                      |
| 24-7-8                       | T-                  | T-                    | 59                                      |
| 24-7-3                       | T-                  | T-                    | 59                                      |
| 24-7-5                       | T-                  | T-                    | 59                                      |
| 24-7-6                       | T-                  | T-                    | 59                                      |
| 24-7-10                      | T-                  | T-                    | 59                                      |
| 24-7-17                      | GA                  | T-                    | 59                                      |
| 24-7-151                     | T-                  | T-                    | 59                                      |
| 24-7-155                     | T-                  | T-                    | 59                                      |
| 1-17-14                      | GA                  | T-                    | 45                                      |
| 1-17-3                       | GA                  | T-                    | 45                                      |
| 2-17-9                       | GA                  | T-                    | 53                                      |
| 2-17-10                      | GA                  | T-                    | 53                                      |
| 2-17-6                       | GA                  | T-                    | 53                                      |
| 2-17-11                      | GA                  | T-                    | 53                                      |
| 2-17-15                      | GA                  | T-                    | 53                                      |
| 2-17-93                      | GA                  | T-                    | 53                                      |
| 2-17-8                       | GA                  | T-                    | 53                                      |
| 2-17-96                      | GA                  | T-                    | 53                                      |
| 6-17-18                      | T-                  | T-                    | 48                                      |
| 7-17-109                     | GA                  | T-                    | 61                                      |
| 14-17-13                     | GA                  | T-                    | 61                                      |
| 14-17-2                      | GA                  | T-                    | 61                                      |
| 16-17-96                     | G-                  | None                  | 32                                      |
| 18-17-4                      | GA                  | T-                    | 46                                      |
| 18-17-5                      | GA                  | T-                    | 46                                      |
| 18-17-6                      | GA                  | T-                    | 46                                      |
| 18-17-14                     | GA                  | T-                    | 46                                      |
| 18-17-15                     | GA                  | T-                    | 46                                      |
| 18-17-19                     | GA                  | T-                    | 46                                      |
| 18-17-98                     | GA                  | T-                    | 46                                      |
| 24-17-16                     | GA                  | T-                    | 59                                      |
| 24-17-5                      | GA                  | T-                    | 59                                      |
| 24-17-4                      | GA                  | T-                    | 59                                      |
| 24-17-12                     | GA                  | T-                    | 59                                      |
| 27-17-109                    | GA                  | T-                    | 45                                      |
| 42-17-109                    | GA                  | T-                    | 48                                      |
| 46-17-91                     | T-                  | T-                    | 61                                      |
| 58-17-1                      | GA                  | None                  | 5                                       |

<sup>a</sup>Relapse serotype-infecting serotype-mouse number. Relapses in italics are used in the analysis for Figure 3.

<sup>b</sup>Length of sequence that was >90% identical in nts to the UHS at the expression site.

Table S3. DHS elements at expression sites for infecting and relapse isolates and the presumptive donor at archival site

| Infecting serotype | Relapse isolate*       | DHS site             | DHS type | Polymorphic positions |    |    |    |    |    |    |    |    |     |     |     |     |     |     |     |     |     |     |     |     |     |     |   |
|--------------------|------------------------|----------------------|----------|-----------------------|----|----|----|----|----|----|----|----|-----|-----|-----|-----|-----|-----|-----|-----|-----|-----|-----|-----|-----|-----|---|
|                    |                        |                      |          | 23                    | 42 | 47 | 59 | 68 | 78 | 81 | 93 | 99 | 107 | 107 | 120 | 129 | 137 | 149 | 154 | 163 | 167 | 192 | 195 | 198 | 211 | 213 |   |
| 7                  | 1-7-12, 20 and 40      | Infecting expression | a        | G                     | G  | G  | C  | C  | A  | G  | A  | A  | A   | T   | A   | T   | C   | A   | A   | T   | T   | -   | -   | C   | C   | A   |   |
|                    |                        | Archival donor       | g        | G                     | G  | A  | T  | C  | G  | G  | A  | A  | A   | T   | A   | T   | C   | A   | A   | T   | T   | -   | -   | C   | C   | C   | A |
|                    |                        | Relapse expression   | g        | G                     | G  | A  | T  | C  | G  | G  | A  | A  | A   | T   | A   | T   | C   | A   | A   | T   | T   | -   | -   | C   | C   | C   | A |
|                    | 1-7-24                 | Infecting expression | a        | G                     | G  | G  | C  | C  | A  | G  | A  | A  | A   | T   | A   | T   | C   | A   | A   | T   | T   | -   | -   | C   | C   | C   | A |
|                    |                        | Archival donor       | b        | G                     | G  | G  | C  | C  | C  | G  | A  | C  | A   | T   | A   | T   | C   | A   | A   | T   | T   | -   | -   | C   | C   | C   | A |
|                    |                        | Relapse expression   | b        | G                     | G  | G  | C  | C  | C  | G  | A  | C  | A   | T   | A   | T   | C   | A   | A   | T   | T   | -   | -   | C   | C   | C   | A |
|                    | 2-7-2, 4, 9 and 21     | Infecting expression | a        | G                     | G  | G  | C  | C  | A  | G  | A  | A  | A   | T   | A   | T   | C   | A   | A   | T   | T   | -   | -   | C   | C   | C   | A |
|                    |                        | Archival donor       | h        | G                     | G  | G  | C  | C  | C  | G  | A  | C  | A   | T   | A   | T   | C   | A   | A   | T   | T   | -   | -   | C   | C   | C   | A |
|                    |                        | Relapse expression   | h/a      | G                     | G  | G  | C  | C  | C  | G  | A  | C  | A   | T   | A   | T   | C   | A   | A   | T   | T   | -   | -   | C   | C   | C   | A |
|                    | 6-7-16 and 150         | Infecting expression | a        | G                     | G  | G  | C  | C  | A  | G  | A  | A  | A   | T   | A   | T   | C   | A   | A   | T   | T   | -   | -   | C   | C   | C   | A |
|                    |                        | Archival donor       | b        | G                     | G  | G  | C  | C  | C  | G  | A  | C  | A   | T   | A   | T   | C   | A   | A   | T   | T   | -   | -   | C   | C   | C   | A |
|                    |                        | Relapse expression   | b        | G                     | G  | G  | C  | C  | C  | G  | A  | C  | A   | T   | A   | T   | C   | A   | A   | T   | T   | -   | -   | C   | C   | C   | A |
|                    | 6-7-11                 | Infecting expression | a        | G                     | G  | G  | C  | C  | A  | G  | A  | A  | A   | T   | A   | T   | C   | A   | A   | T   | T   | -   | -   | C   | C   | C   | A |
|                    |                        | Archival donor       | f        | G                     | G  | G  | C  | C  | C  | G  | A  | A  | T   | A   | T   | C   | A   | A   | T   | T   | -   | -   | C   | C   | C   | A   |   |
|                    |                        | Relapse expression   | f/a      | G                     | G  | G  | C  | C  | C  | G  | A  | A  | T   | A   | T   | C   | A   | A   | T   | T   | -   | -   | C   | C   | C   | A   |   |
|                    | 17-7-37                | Infecting expression | a        | G                     | G  | G  | C  | C  | A  | G  | A  | A  | A   | T   | A   | T   | C   | A   | A   | T   | T   | -   | -   | C   | C   | C   | A |
|                    |                        | Archival donor       | l        | T                     | G  | G  | T  | T  | A  | G  | C  | G  | T   | G   | T   | C   | A   | A   | T   | T   | -   | -   | C   | C   | C   | A   |   |
|                    |                        | Relapse expression   | l        | T                     | G  | G  | T  | T  | A  | G  | C  | G  | T   | G   | T   | C   | A   | A   | T   | T   | -   | -   | C   | C   | C   | A   |   |
|                    | 7/18-7-22              | Infecting expression | a        | G                     | G  | G  | C  | C  | A  | G  | A  | A  | A   | T   | A   | T   | C   | A   | A   | T   | T   | -   | -   | C   | C   | C   | A |
|                    |                        | Archival donor       | i        | G                     | A  | G  | C  | C  | A  | G  | A  | A  | A   | T   | A   | T   | C   | A   | A   | T   | T   | -   | -   | C   | C   | C   | A |
|                    |                        | Relapse expression   | i        | G                     | A  | G  | C  | C  | A  | G  | A  | A  | A   | T   | A   | T   | C   | A   | A   | T   | T   | -   | -   | C   | C   | C   | A |
|                    | 18-7-4, 10, 18, and 21 | Infecting expression | a        | G                     | G  | G  | C  | C  | A  | G  | A  | A  | A   | T   | A   | T   | C   | A   | A   | T   | T   | -   | -   | C   | C   | C   | A |
|                    |                        | Archival donor       | i        | G                     | A  | G  | C  | C  | A  | G  | A  | A  | A   | T   | A   | T   | C   | A   | A   | T   | T   | -   | -   | C   | C   | C   | A |
|                    |                        | Relapse expression   | i        | G                     | A  | G  | C  | C  | A  | G  | A  | A  | A   | T   | A   | T   | C   | A   | A   | T   | T   | -   | -   | C   | C   | C   | A |
|                    | 18-7-20                | Infecting expression | a        | G                     | G  | G  | C  | C  | A  | G  | A  | A  | A   | T   | A   | T   | C   | A   | A   | T   | T   | -   | -   | C   | C   | C   | A |
|                    |                        | Archival donor       | i        | G                     | A  | G  | C  | C  | A  | G  | A  | A  | A   | T   | A   | T   | C   | A   | A   | T   | T   | -   | -   | C   | C   | C   | A |
|                    |                        | Relapse expression   | i        | G                     | A  | G  | C  | C  | A  | G  | A  | A  | A   | T   | A   | T   | C   | A   | A   | T   | T   | -   | -   | C   | C   | C   | A |
|                    | 18-7-2                 | Infecting expression | a        | G                     | G  | G  | C  | C  | A  | G  | A  | A  | A   | T   | A   | T   | C   | A   | A   | T   | T   | -   | -   | C   | C   | C   | A |
|                    |                        | Archival donor       | i        | G                     | A  | G  | C  | C  | A  | G  | A  | A  | A   | T   | A   | T   | C   | A   | A   | T   | T   | -   | -   | C   | C   | C   | A |
|                    |                        | Relapse expression   | i/a      | G                     | A  | G  | C  | C  | A  | G  | A  | A  | A   | T   | A   | T   | C   | A   | A   | T   | T   | -   | -   | C   | C   | C   | A |
|                    | 18-7-23                | Infecting expression | a        | G                     | G  | G  | C  | C  | A  | G  | A  | A  | A   | T   | A   | T   | C   | A   | A   | T   | T   | -   | -   | C   | C   | C   | A |
|                    |                        | Archival donor       | i        | G                     | A  | G  | C  | C  | A  | G  | A  | A  | A   | T   | A   | T   | C   | A   | A   | T   | T   | -   | -   | C   | C   | C   | A |
|                    |                        | Relapse expression   | i/a      | G                     | A  | G  | C  | C  | A  | G  | A  | A  | A   | T   | A   | T   | C   | A   | A   | T   | T   | -   | -   | C   | C   | C   | A |
|                    | 24-7-8, 13, 18 and 22  | Infecting expression | a        | G                     | G  | G  | C  | C  | A  | G  | A  | A  | A   | T   | A   | T   | C   | A   | A   | T   | T   | -   | -   | C   | C   | C   | A |
|                    |                        | Archival donor       | f        | G                     | G  | G  | C  | C  | C  | G  | A  | A  | A   | T   | A   | T   | C   | A   | A   | T   | T   | -   | -   | C   | C   | C   | A |
|                    |                        | Relapse expression   | f        | G                     | G  | G  | C  | C  | C  | G  | A  | A  | A   | T   | A   | T   | C   | A   | A   | T   | T   | -   | -   | C   | C   | C   | A |
| 24-7-3             | Infecting expression   | a                    | G        | G                     | G  | C  | C  | A  | G  | A  | A  | A  | T   | A   | T   | C   | A   | A   | T   | T   | -   | -   | C   | C   | C   | A   |   |
|                    | Archival donor         | a                    | f        | G                     | G  | C  | C  | C  | G  | A  | A  | A  | T   | A   | T   | C   | A   | A   | T   | T   | -   | -   | C   | C   | C   | A   |   |
|                    | Relapse expression     | f/a                  | G        | G                     | G  | C  | C  | C  | G  | A  | A  | A  | T   | A   | T   | C   | A   | A   | T   | T   | -   | -   | C   | C   | C   | A   |   |
| 24-7-5, 6, and 10  | Infecting expression   | a                    | G        | G                     | G  | C  | C  | A  | G  | A  | A  | A  | T   | A   | T   | C   | A   | A   | T   | T   | -   | -   | C   | C   | C   | A   |   |
|                    | Archival donor         | f                    | G        | G                     | G  | C  | C  | C  | G  | A  | A  | A  | T   | A   | T   | C   | A   | A   | T   | T   | -   | -   | C   | C   | C   | A   |   |
|                    | Relapse expression     | f/a                  | G        | G                     | G  | C  | C  | C  | G  | A  | A  | A  | T   | A   | T   | C   | A   | A   | T   | T   | -   | -   | C   | C   | C   | A   |   |
| 24-7-17            | Infecting expression   | a                    | G        | G                     | G  | C  | C  | A  | G  | A  | A  | A  | T   | A   | T   | C   | A   | A   | T   | T   | -   | -   | C   | C   | C   | A   |   |
|                    | Archival donor         | b                    | G        | G                     | G  | C  | C  | C  | G  | A  | C  | A  | T   | A   | T   | C   | A   | A   | T   | T   | -   | -   | C   | C   | C   | A   |   |
|                    | Relapse expression     | b                    | G        | G                     | G  | C  | C  | C  | G  | A  | C  | A  | T   | A   | T   | C   | A   | A   | T   | T   | -   | -   | C   | C   | C   | A   |   |
| 17                 | 1-17-14                | Infecting expression | l        | T                     | G  | G  | T  | T  | A  | G  | C  | G  | T   | G   | T   | C   | A   | A   | T   | T   | -   | -   | C   | C   | C   | A   |   |
|                    |                        | Archival donor       | g        | G                     | G  | A  | T  | C  | G  | G  | A  | A  | A   | T   | A   | T   | C   | A   | A   | T   | T   | -   | -   | C   | C   | C   | A |
|                    |                        | Relapse expression   | g        | G                     | G  | A  | T  | C  | G  | G  | A  | A  | A   | T   | A   | T   | C   | A   | A   | T   | T   | -   | -   | C   | C   | C   | A |
|                    | 1-17-3                 | Infecting expression | l        | T                     | G  | G  | T  | T  | A  | G  | C  | G  | T   | G   | T   | C   | A   | A   | T   | T   | -   | -   | C   | C   | C   | A   |   |
|                    |                        | Archival donor       | d        | G                     | G  | T  | C  | G  | A  | A  | A  | A  | T   | A   | T   | C   | A   | A   | T   | T   | -   | -   | C   | C   | C   | A   |   |
|                    |                        | Relapse expression   | d        | G                     | G  | T  | C  | G  | A  | A  | A  | A  | T   | A   | T   | C   | A   | A   | T   | T   | -   | -   | C   | C   | C   | A   |   |
|                    | 2-17-9 and 10          | Infecting expression | l        | T                     | G  | G  | T  | T  | A  | G  | C  | G  | T   | G   | T   | C   | A   | A   | T   | T   | -   | -   | C   | C   | C   | A   |   |
|                    |                        | Archival donor       | h        | G                     | G  | G  | C  | C  | C  | G  | A  | C  | A   | T   | A   | T   | C   | A   | A   | T   | T   | -   | -   | C   | C   | C   | A |
|                    |                        | Relapse expression   | h/l      | G                     | G  | G  | C  | C  | C  | G  | A  | C  | A   | T   | A   | T   | C   | A   | A   | T   | T   | -   | -   | C   | C   | C   | A |
|                    | 2-17-6, 11 and 15      | Infecting expression | l        | T                     | G  | G  | T  | T  | A  | G  | C  | G  | T   | G   | T   | C   | A   | A   | T   | T   | -   | -   | C   | C   | C   | A   |   |
|                    |                        | Archival donor       | h        | G                     | G  | G  | C  | C  | C  | G  | A  | C  | A   | T   | A   | T   | C   | A   | A   | T   | T   | -   | -   | C   | C   | C   | A |
|                    |                        | Relapse expression   | h/l      | G                     | G  | G  | C  | C  | C  | G  | A  | C  | A   | T   | A   | T   | C   | A   | A   | T   | T   | -   | -   | C   | C   | C   | A |
|                    | 2-17-91                | Infecting expression | l        | T                     | G  | G  | T  | T  | A  | G  | C  | G  | T   | G   | T   | C   | A   | A   | T   | T   | -   | -   | C   | C   | C   | A   |   |
|                    |                        | Archival donor       | h        | G                     | G  | G  | C  | C  | C  | G  | A  | C  | A   | T   | A   | T   | C   | A   | A   | T   | T   | -   | -   | C   | C   | C   | A |
|                    |                        | Relapse expression   | h        | G                     | G  | G  | C  | C  | C  | G  | A  | C  | A   | T   | A   | T   | C   | A   | A   | T   | T   | -   | -   | C   | C   | C   | A |
|                    | 2-17-93                | Infecting expression | l        | T                     | G  | G  | T  | T  | A  | G  | C  | G  | T   | G   | T   | C   | A   | A   | T   | T   | -   | -   | C   | C   | C   | A   |   |
|                    |                        | Archival donor       | b        | G                     | G  | G  | C  | C  | C  | G  | A  | C  | A   | T   | A   | T   | C   | A   | A   | T   | T   | -   | -   | C   | C   | C   | A |
|                    |                        | Relapse expression   | b        | G                     | G  | G  | C  | C  | C  | G  | A  | C  | A   | T   | A   | T   | C   | A   | A   | T   | T   | -   | -   | C   | C   | C   | A |
|                    | 2-17-8                 | Infecting expression | l        | T                     | G  | G  | T  | T  | A  | G  | C  | G  | T   | G   | T   | C   | A   | A   | T   | T   | -   | -   | C   | C   | C   | A   |   |
|                    |                        | Archival donor       | ?        | ?                     | ?  | ?  | ?  | ?  | ?  | ?  | ?  | ?  | ?   | ?   | ?   | ?   | ?   | ?   | ?   | ?   | ?   | ?   | ?   | ?   | ?   | ?   |   |
|                    |                        | Relapse expression   | h/f      | G                     | G  | G  | C  | C  | C  | G  | A  | C  | A   | T   | A   | T   | C   | A   | A   | T   | T   | -   | -   | C   | C   | C   | A |
|                    | 6-17-18                | Infecting expression | l        | T                     | G  | G  | T  | T  | A  | G  | C  | G  | T   | G   | T   | C   | A   | A   | T   | T   | -   | -   | C   | C   | C   | A   |   |
|                    |                        | Archival donor       | b        | G                     | G  | G  | C  | C  | C  | G  | A  | C  | A   | T   | A   | T   | C   | A   | A   | T   | T   | -   | -   | C   | C   | C   | A |
|                    |                        | Relapse expression   | b        | G                     | G  | G  | C  | C  | C  | G  | A  | C  | A   | T   | A   | T   | C   | A   | A   | T   | T   | -   | -   | C   | C   | C   | A |
|                    | 13-17-89               | Infecting expression | l        | T                     | G  | G  | T  | T  | A  | G  | C  | G  | T   | G   | T   | C   | A   | A   | T   | T   | -   | -   | C   | C   | C   |     |   |
